# Supplementary material
Source: Springer Nature journal article supplement (https://www.springermedizin.de/resource/supplementary/13075_2009_2770_MOESM6_ESM.pdf/9692850)

**A**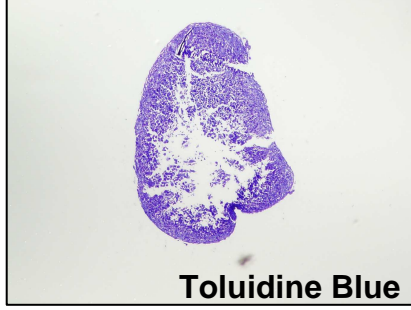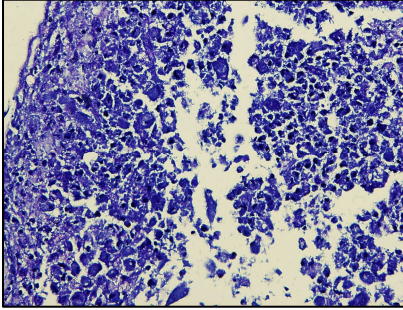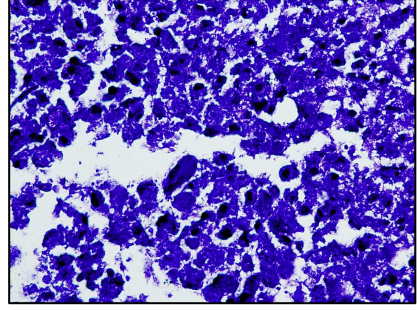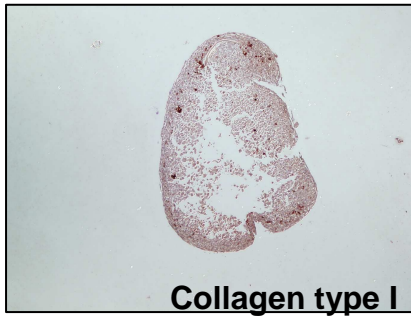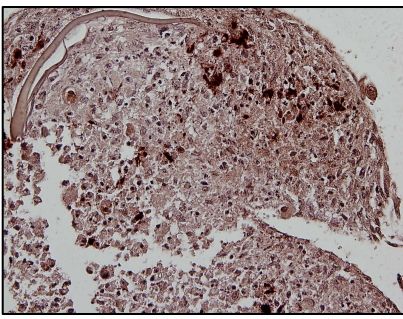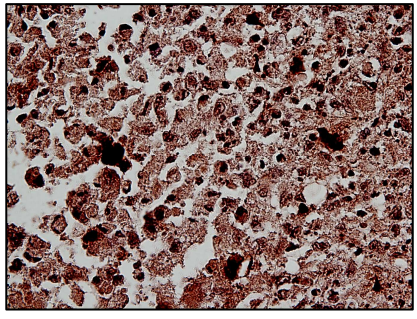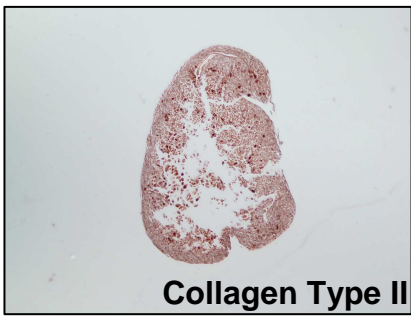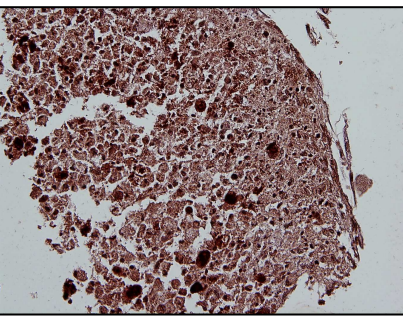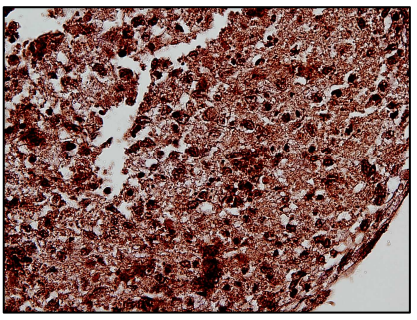**B**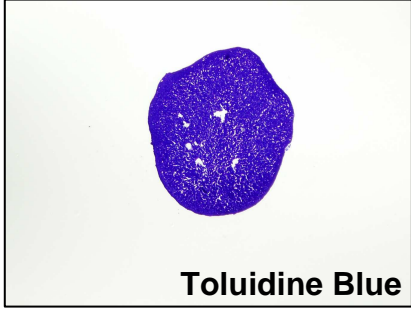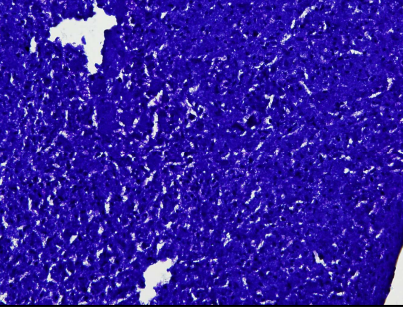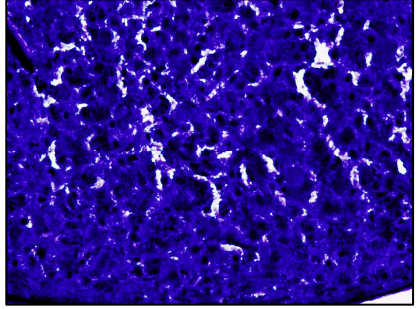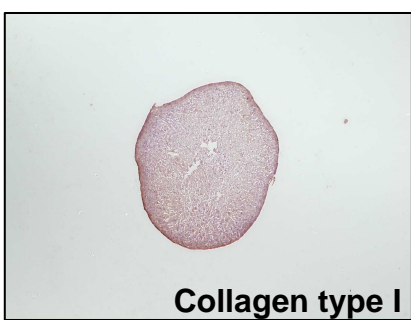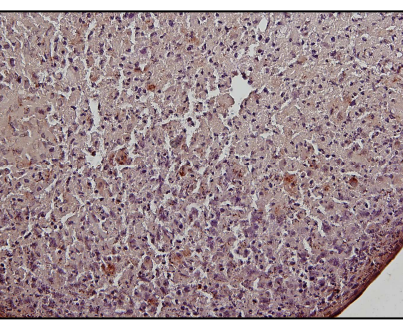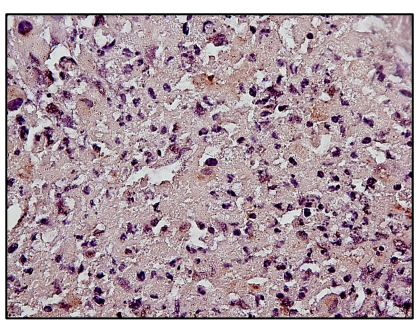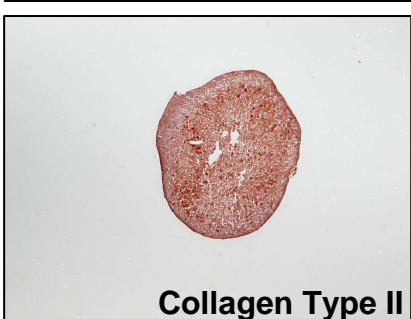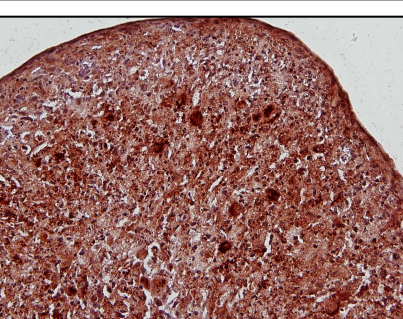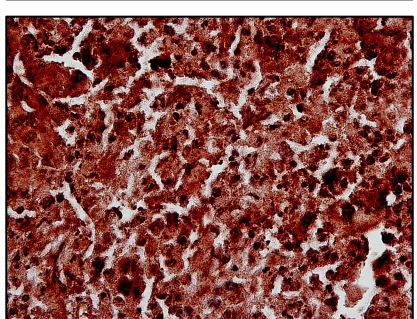**40X****200X****400X**

Supplement: MOESM6 [file 9692850]
